# Supplementary figures and images for: Gene Expression Divergence and Evolutionary Analysis of the Drosomycin Gene Family in Drosophila melanogaster
Source: Hindawi journal article supplement (doi:10.1155/2009/315423), 2009-01-01

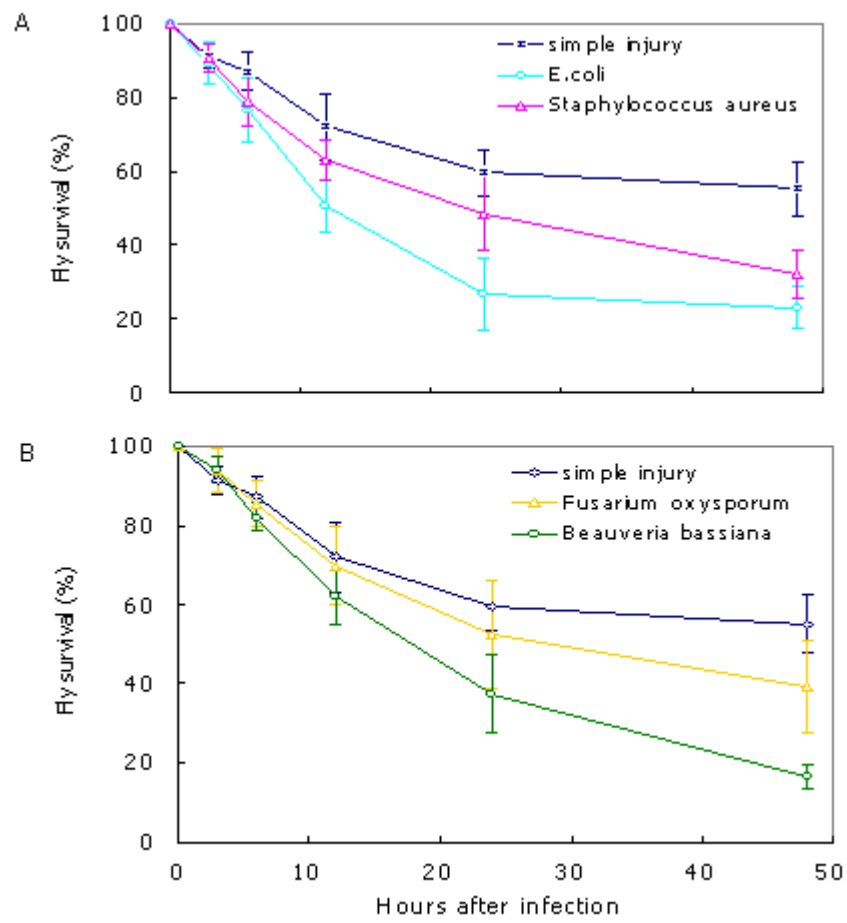

Supplement: f1 [file 315423.f1.pdf]
